# Supplementary material for: Development of bio-acrylic polymers from Cyrene™: transforming a green solvent to a green polymer
Source: Royal Society of Chemistry journal article supplement (doi:10.1039/c9py00353c), 2019-01-01
Supplement: c9py00353c1.pdf [file c9py00353c1.pdf]

## Supporting Information

### The development of bio-acrylic polymers from Cyrene™: transforming a green solvent to a green polymer

Parijat Ray,<sup>a</sup> Timothy Hughes<sup>d</sup>, Craig Smith<sup>b</sup>, Mena Hibbert<sup>c</sup>, Kei Saito<sup>d</sup> and George P Simon<sup>a</sup>

<sup>a</sup>Department of Materials Science & Engineering, Monash University, Clayton, VIC 3800, Australia. e-mail: george.simon@monash.edu; Fax: +61 399054934; Tel: +61 399054936

<sup>b</sup>PPG Industries, Springdale, PA 15144, USA

<sup>c</sup>PPG Industries Australia Pty Ltd, Clayton, Victoria 3168, Australia

<sup>d</sup>School of Chemistry, Monash University, Clayton, VIC 3800, Australia. e-mail: kei.saito@monash.edu; Fax: +6139905851; Tel: +61399054600

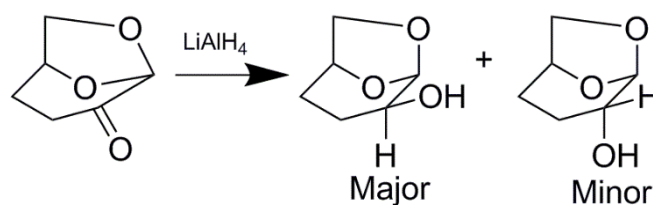

Fig. S1 Stereo centers of Levoglucosanol (Cyrene-OH)

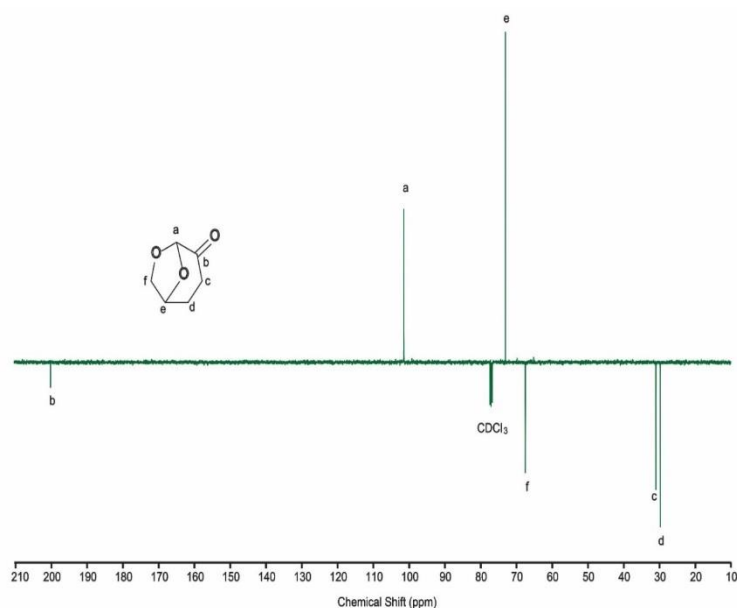

Fig S2 <sup>13</sup>C NMR of Cyrene

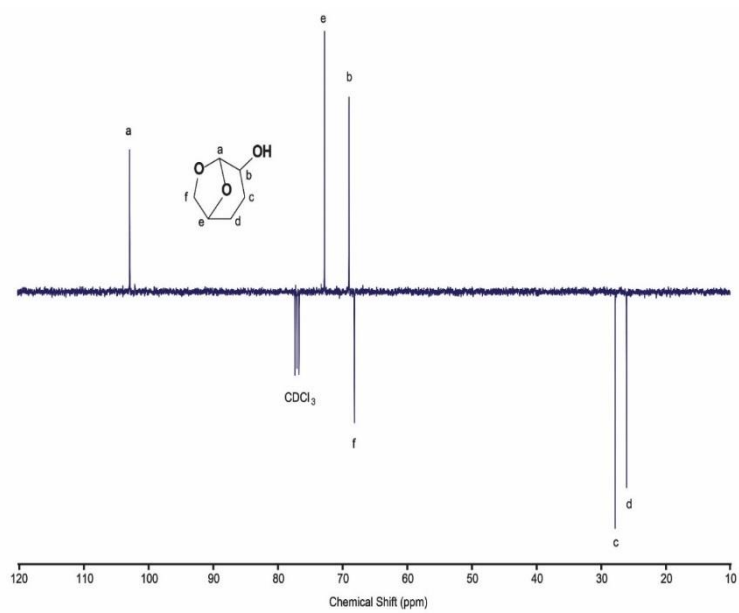

Fig S3  $^{13}\text{C}$  NMR of Cyrene-OH

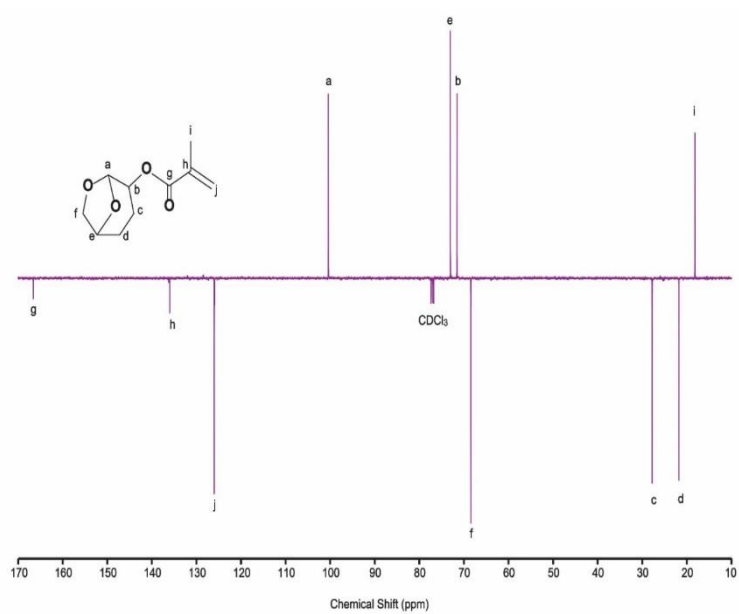

Fig. S4  $^{13}\text{C}$  NMR of m-Cyrene

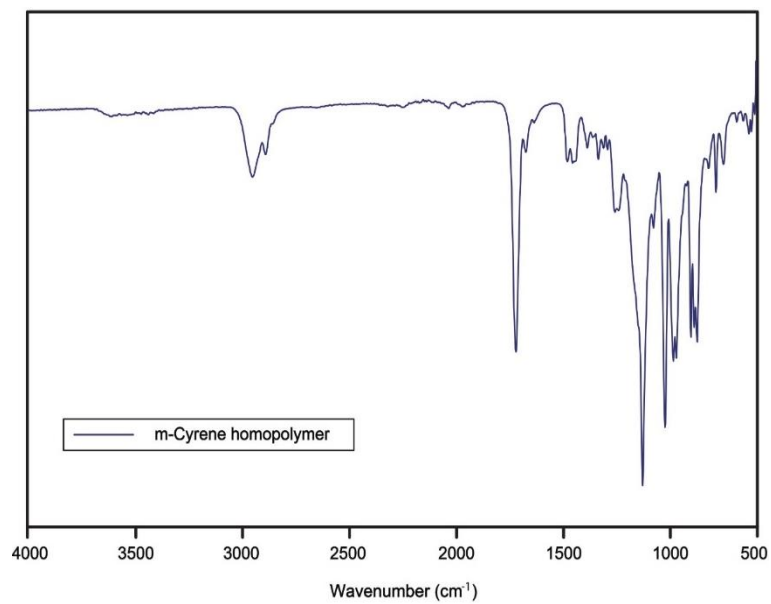

Fig. S5 ATR-FTIR spectrum of m-Cyrene homopolymer

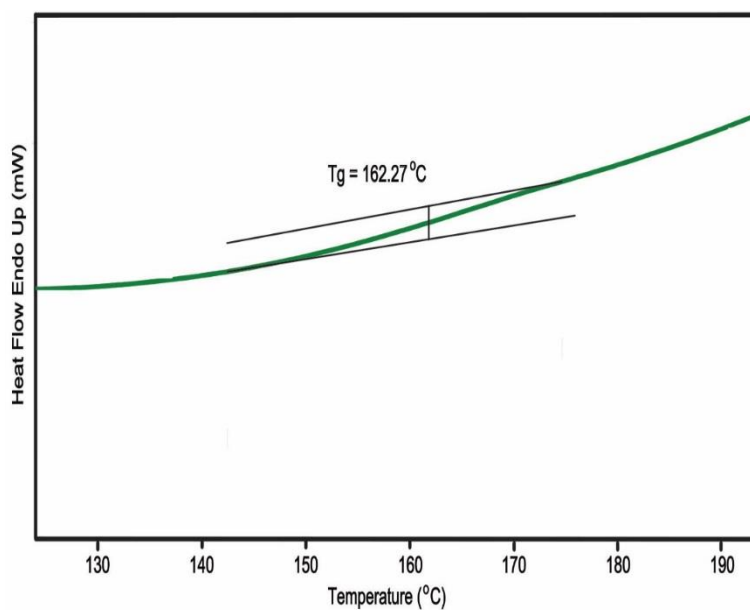

Fig. S6 DSC analysis of m-Cyrene homopolymer from bulk polymerization

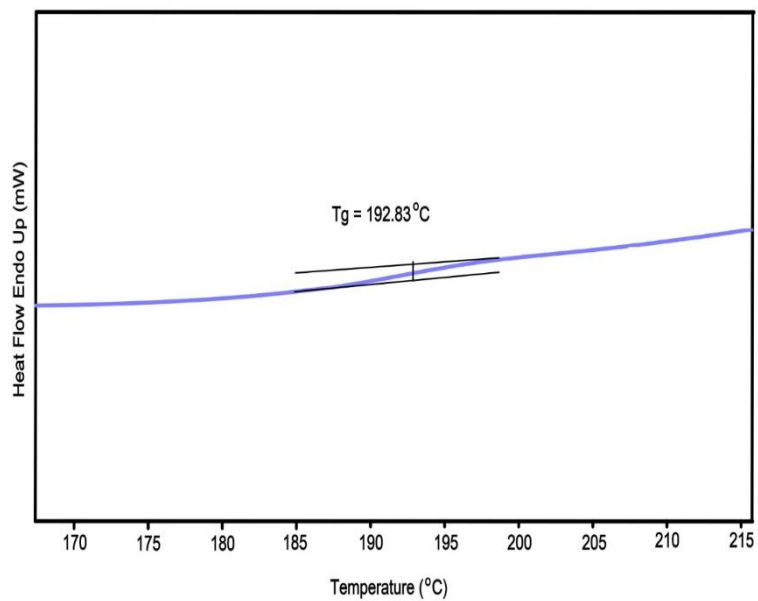

Fig. S7 DSC analysis of m-Cyrene homopolymer by emulsion polymerization

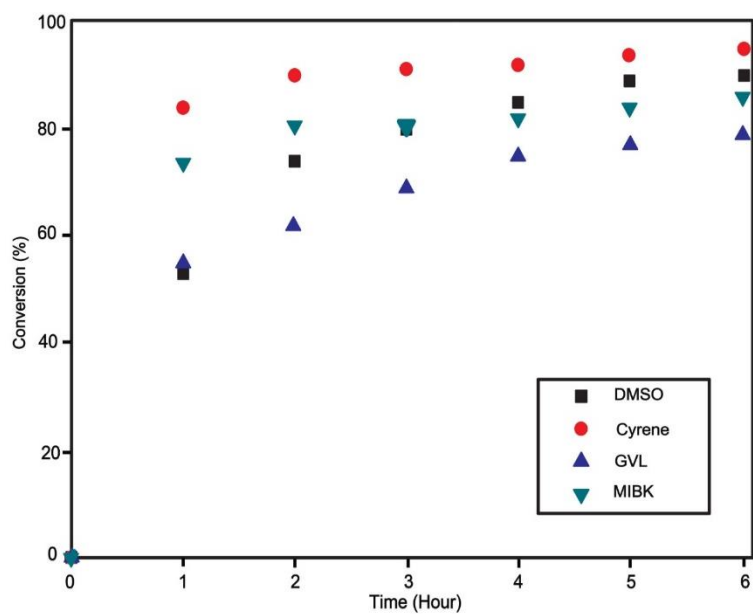

Fig. S8 Polymerization kinetics of m-Cyrene in different solvents

**Reactivity ratio calculation using Fineman-Ross (F-R) and Kelen-Tüdös (K-T) models**

F-R model  $G = r_1 H - r_2$  (1)

K-T model  $\eta = [r_1 + r_2/\alpha]\mu - r_2/\alpha$

where,  $G = F(f - 1)/f$ ,  $H = F^2/f$ ,  $\eta = G/(\alpha + H)$ ,  $\mu = H/(\alpha + H)$ ,  $F = M_1/M_2$ ,  $f = m_1/m_2$

$\alpha = (H_{max}H_{min})^{1/2}$ ,  $M_1$ = mole fraction of m-Cyrene in feed,  $M_2$ = mole fraction of IBMA in feed,

$m_1$ = mole fraction of m-Cyrene in copolymer,  $m_2$ = mole fraction of IBMA in copolymer,

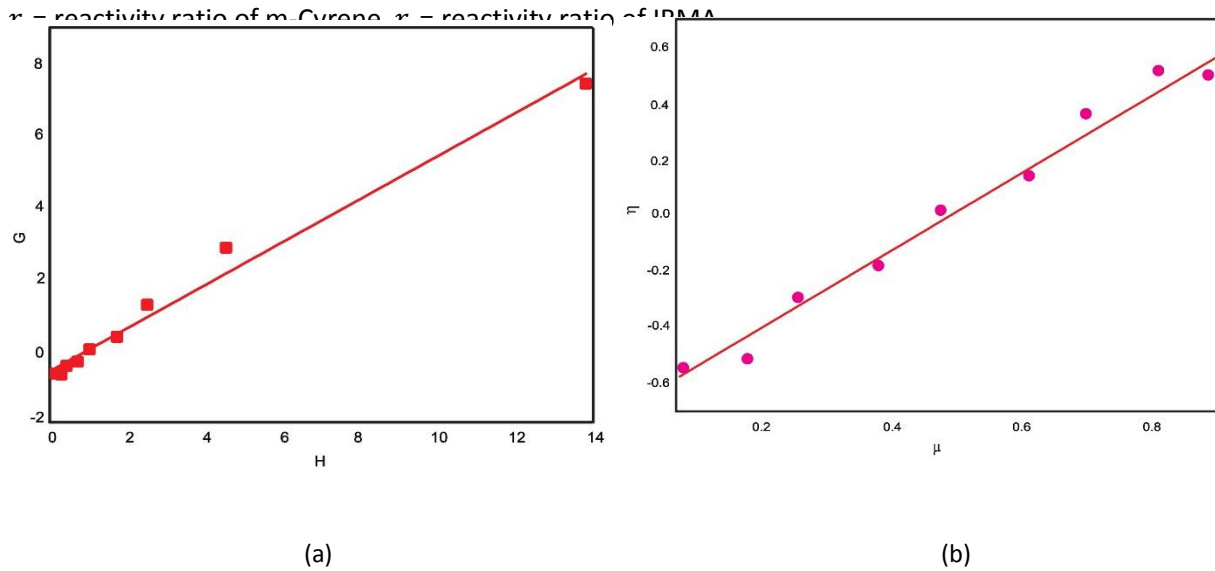

Fig. S9 (a) F-R model and (b) K-T model

In F-R and K-T models, G is plotted against H (Fig S8.a) and  $\eta$  is plotted against  $\mu$  (Fig S8.b)

respectively. G vs H plot gives a straight line with  $r_1$  as slope and  $-r_2$  as the intercept. Similar plot of

$\eta$  vs  $\mu$  provides  $[r_1 + r_2/\alpha]$  as a slope and  $(-r_2/\alpha)$  as its intercept.
